# Supplementary material for: LABA/LAMA as First-Line Therapy for COPD: A Summary of the Evidence and Guideline Recommendations
Source: MDPI journal article supplement (doi:10.3390/jcm11226623), 2022-11-08
Supplement: s1 [file s1]

## Supplementary

**Table S1.** Meta-analyses comparing LABA/LAMA with monotherapy, LABA/ICS or triple therapy.

| Reference                      | Comparison                           | Outcome                                                                     | Findings                                                            |
|--------------------------------|--------------------------------------|-----------------------------------------------------------------------------|---------------------------------------------------------------------|
| Oba Cochrane Library 2018 [34] | LABA/LAMA vs LAMA, LABA and LABA/ICS | Moderate-to-severe exacerbations                                            | Vs LAMA: OR 0.96 (95% CI 0.75–1.23; $p=0.77$ ; $I^2=52\%$ )         |
|                                |                                      |                                                                             | Vs LABA: OR 0.77 (95% CI 0.62–0.97; $p=0.02$ ; $I^2=0\%$ )          |
|                                |                                      |                                                                             | Vs LABA/ICS: OR 0.86 (95% CI 0.74–1.00; $P=0.05$ ; $I^2=10\%$ )     |
|                                |                                      | SGRQ (change from BL at 12 months)                                          | Vs LAMA: MD –1.15 (95% CI –2.24 to –0.06; $P=0.04$ ; $I^2=34\%$ )   |
|                                |                                      |                                                                             | Vs LABA: MD –0.69 (95% CI –1.64 to 0.25; $P=0.15$ ; $I^2=0\%$ )     |
|                                |                                      |                                                                             | Vs LABA/ICS: MD –1.2 (95% CI –2.34 to –0.06; $P=0.04$ ; $I^2=N/A$ ) |
|                                |                                      | TDI (change from BL at 12 months vs LAMA and LABA and 6 months vs LABA/ICS) | Vs LAMA: MD 0.21 (95% CI 0.1–0.33; $P=0$ ; $I^2=0\%$ )              |
|                                |                                      |                                                                             | Vs LABA: MD 0.42 (95% CI 0.06–0.77; $P=0.02$ ; $I^2=76\%$ )         |
|                                |                                      |                                                                             | Vs LABA/ICS: MD 0.13 (95% CI –0.24 to 0.51; $P=0.48$ ; $I^2=0\%$ )  |
|                                |                                      | FEV <sub>1</sub> (change from BL at 12 months, L)                           | Vs LAMA: MD 0.06 (95% CI 0.04–0.08; $P<0.0001$ ; $I^2=65\%$ )       |
|                                |                                      |                                                                             | Vs LABA: MD 0.07 (95% CI 0.06–0.09; $P<0.0001$ ; $I^2=45\%$ )       |
|                                |                                      |                                                                             | Vs LABA/ICS: MD 0.06 (95% CI 0.04–0.08; $P<0.0001$ ; $I^2=N/A$ )    |
|                                |                                      | Mortality                                                                   | Vs LAMA: OR 1.01 (95% CI 0.75–1.36; $P=0.96$ ; $I^2=0\%$ )          |

|                                     |                                                                 |                                  |                                                                                    |
|-------------------------------------|-----------------------------------------------------------------|----------------------------------|------------------------------------------------------------------------------------|
|                                     |                                                                 |                                  | Vs LABA: OR 1.19 (95% CI 0.68–2.09; P=0.54; I <sup>2</sup> =0%)                    |
|                                     |                                                                 |                                  | Vs LABA/ICS: OR 1.01 (95% CI 0.61–1.68; P=0.96; I <sup>2</sup> =0%)                |
|                                     |                                                                 | Pneumonia                        | Vs LAMA: OR 1.13 (95% CI 0.83–1.53; P=0.43; I <sup>2</sup> =0%)                    |
|                                     |                                                                 |                                  | Vs LABA: OR 1.54 (95% CI 0.95–2.49; P=0.08; I <sup>2</sup> =0%)                    |
|                                     |                                                                 |                                  | Vs LABA/ICS: OR 0.57 (95% CI 0.39–0.84; P=0; I <sup>2</sup> =0%)                   |
| Chen Ther Adv Respir Dis 2020 [35]  | LABA/LAMA vs LAMA (RCTs with treatment duration of 24–64 weeks) | Time to first exacerbation       | HR 0.96 (95% CI 0.79–1.18; P=0.71, I <sup>2</sup> =46%)                            |
|                                     |                                                                 | Moderate-to-severe exacerbations | Risk ratio 0.96 (95% CI 0.90–1.03; P=0.28, I <sup>2</sup> =16%)                    |
|                                     |                                                                 | Severe exacerbations             | Risk ratio 0.92 (95% CI 0.81–1.03, P=0.15, I <sup>2</sup> =0%)                     |
|                                     |                                                                 | All exacerbations                | Risk ratio 0.92 (95% CI 0.86–1.00; P=0.04, I <sup>2</sup> =0%)                     |
| Mammen Ann Am Thorac Soc 2020a [36] | LABA/LAMA vs LABA or LAMA (study duration of 2–62 weeks)        | Dyspnea                          | SMD 0.10 (95% CI 0.07–0.13; P<0.00001; $\chi^2$ P=0.44; I <sup>2</sup> =0%)        |
|                                     |                                                                 | Hospital admissions              | Risk ratio 0.89 (95% CI 0.82–0.97; P=0.01; $\chi^2$ P=0.58; I <sup>2</sup> =0%)    |
|                                     |                                                                 | AECOPD                           | Risk ratio 0.80 (95% CI 0.69–0.92; P=0.002; $\chi^2$ P<0.001; I <sup>2</sup> =88%) |
|                                     |                                                                 | HRQoL                            | SMD –0.13 (95% CI –0.16 to 0.10; P<0.00001; $\chi^2$ P=0.67; I <sup>2</sup> =0%)   |
|                                     |                                                                 | Treatment-related AEs            | Risk ratio 0.99 (95% CI 0.97–1.01; P=0.34; $\chi^2$ P=0.72; I <sup>2</sup> =0%)    |
|                                     |                                                                 | Incidence of pneumonia           | Risk ratio 1.07 (95% CI 0.93–1.23; P=0.36; $\chi^2$ P=0.62; I <sup>2</sup> =0%)    |

|                                                   |                                                               |                                                            |                                                                                                                                                        |
|---------------------------------------------------|---------------------------------------------------------------|------------------------------------------------------------|--------------------------------------------------------------------------------------------------------------------------------------------------------|
|                                                   |                                                               | All-cause mortality                                        | Risk ratio 0.92 (95% CI 0.76–1.13; P=0.44; $\chi^2$ P=0.99; I <sup>2</sup> =0%)                                                                        |
|                                                   |                                                               | FEV <sub>1</sub> (L)                                       | MD 0.08 (95% CI 0.06–0.09; P<0.00001; $\chi^2$ P<0.0001; I <sup>2</sup> =98%)                                                                          |
| Rodrigo Int J Chron Obstruct Pulmon Dis 2017 [38] | LABA/LAMA vs LAMA or LABA/ICS (study duration of 12–64 weeks) | Trough FEV <sub>1</sub> (change from BL at 24–26 weeks, L) | Vs LAMA: MD 0.07 (95% CI 0.05–0.08; P<0.0001; I <sup>2</sup> =56%)<br>Vs LABA/ICS: MD 0.06 (95% CI 0.00–0.12; P=0.04; I <sup>2</sup> =90%)             |
|                                                   |                                                               | TDI focal score (change from BL at 24–26 weeks)            | Vs LAMA: MD 0.29 (95% CI 0.12–0.46; P=0.0006; I <sup>2</sup> =0%)                                                                                      |
|                                                   |                                                               |                                                            | Vs LABA/ICS: MD 0.33 (95% CI –0.28 to 0.95; P=0.29; I <sup>2</sup> =0%)                                                                                |
|                                                   |                                                               | SGRQ (change from BL at 24–26 weeks)                       | Vs LAMA: MD –1.34 (95% CI –1.94 to –0.75; P<0.0001; I <sup>2</sup> =0%)<br>Vs LABA/ICS: MD –1.13 (95% CI –1.78 to –0.48; P=0.0006; I <sup>2</sup> =0%) |
|                                                   |                                                               | Moderate/severe exacerbations                              | Vs LABA/ICS: risk ratio 0.82 (95% CI 0.75–0.91; P<0.0001; I <sup>2</sup> =6%)                                                                          |
|                                                   |                                                               | Any AE                                                     | Vs LAMA: relative risk 1.00 (95% CI 0.98–1.02; P=0.95; I <sup>2</sup> =0%)                                                                             |
|                                                   |                                                               |                                                            | Vs LABA/ICS: relative risk 0.94 (95% CI 0.89–0.99; P=0.02; I <sup>2</sup> =23%)                                                                        |
|                                                   |                                                               | Pneumonia                                                  | Vs LAMA: relative risk 1.04 (95% CI 0.78, 1.38; P=0.79; I <sup>2</sup> =0%)                                                                            |
|                                                   |                                                               |                                                            | Vs LABA/ICS: relative risk 0.59 (95% CI 0.43–0.81; P=0.001; I <sup>2</sup> =0%)                                                                        |

|                                                |                                                                    |                                                          |                                                                                                                                                                                                                                                        |
|------------------------------------------------|--------------------------------------------------------------------|----------------------------------------------------------|--------------------------------------------------------------------------------------------------------------------------------------------------------------------------------------------------------------------------------------------------------|
| Calzetta Eur Respir Rev 2017 [39]              | LABA/LAMA vs LABA or LAMA                                          | Trough FEV <sub>1</sub> , SGRQ, TDI (3, 6 and 12 months) | LABA/LAMA always showed the highest probability of being the best therapy with regard to trough FEV <sub>1</sub> , SGRQ and TDI at all time points (overall 98.67%) as confirmed by SUCRA (overall 99.28%); LAMA and LABA were ranked second and third |
| Calzetta Respir Med 2017 [41]                  | LABA/LAMA vs LABA or LAMA (study duration of 2–12 weeks)           | Endurance time                                           | LABA/LAMA: highest probability of being best therapy (100%), followed by LAMA (66%) and LABA (32%), as indicated by SUCRA analysis                                                                                                                     |
|                                                |                                                                    | Inspiratory capacity                                     | LABA/LAMA: highest probability of being best therapy (100%), followed by LAMA (64%) and LABA (36%), as indicated by SUCRA analysis                                                                                                                     |
| Aziz Int J Chron Obstruct Pulmon Dis 2018 [42] | LABA/LAMA vs SAMA, LAMA, LABA/ICS                                  | FEV <sub>1</sub> (12–24 weeks)                           | LABA/LAMA ranked highest (SUCRA values ranging from 64.5% to 97.6%)                                                                                                                                                                                    |
|                                                |                                                                    | TDI (12–24 weeks)                                        | LABA/LAMA ranked highest (SUCRA values ranging from 53.5% to 97.8%)                                                                                                                                                                                    |
|                                                |                                                                    | SGRQ (12–24 weeks)                                       | LABA/LAMA ranked highest (SUCRA values ranging from 60.6% to 93.1%)                                                                                                                                                                                    |
|                                                |                                                                    | AEs (12–24 weeks)                                        | LABA/LAMA ranked highest (SUCRA values ranging from 33.7% to 83.9%)                                                                                                                                                                                    |
| Miravittles Respir Res 2017 [56]               | LABA/LAMA vs LAMA, LABA or LABA/ICS (study duration of 6–52 weeks) | FEV <sub>1</sub> (12 weeks)                              | Significantly higher trough FEV <sub>1</sub> vs LAMA (MD 0.06 [95% CI 0.04–0.07], I <sup>2</sup> =33%) or LABA (MD 0.09 [95% CI 0.07–0.10], I <sup>2</sup> = 0%); both P<0.00001                                                                       |
|                                                |                                                                    | TDI, change from BL                                      | Significantly improved TDI vs LAMA (MD 0.44 [95% CI 0.22–0.65]; <0.0001; I <sup>2</sup> =0%)                                                                                                                                                           |
|                                                |                                                                    | SGRQ, change from BL                                     | Significantly improved SGRQ vs LAMA (MD -1.56 [95% CI -2.41 to -0.71]; P=0.0003; I <sup>2</sup> =0%)                                                                                                                                                   |

|                                           |                                                                                                          |                                             |                                                                                                                                                                                                             |
|-------------------------------------------|----------------------------------------------------------------------------------------------------------|---------------------------------------------|-------------------------------------------------------------------------------------------------------------------------------------------------------------------------------------------------------------|
|                                           |                                                                                                          | AEs                                         | No significant difference vs LAMA or LABA (risk ratio 0.99 [95% CI 0.96–1.02]; P=0.57 I <sup>2</sup> = 0%)                                                                                                  |
| Cazzola Eur Respir J 2018 [66]            | LABA/LAMA vs LAMA, LABA or LABA/LAMA/ICS (treatment duration of 2–52 weeks)                              | Risk of AECOPD                              | Relative risk for LABA/LAMA/ICS vs LABA/LAMA: 0.86 (95%CI 0.75–0.99); I <sup>2</sup> (triple vs dual): 98%; P<0.01<br><br>SUCRA (highest to lowest): LABA/LAMA/ICS 0.99; LABA/LAMA 0.39; LAMA or LABA 0.12  |
|                                           |                                                                                                          | FEV <sub>1</sub> change from BL             | MD for LABA/LAMA/ICS vs LABA/LAMA: 38.05 (95% CI 22.06–54.04); I <sup>2</sup> (triple vs dual): 45%; P=0.13<br><br>SUCRA (highest to lowest): LABA/LAMA/ICS 1.00; LABA/LAMA 0.50; LAMA or LABA 0.00         |
|                                           |                                                                                                          | Risk of pneumonia                           | Relative risk for LABA/LAMA/ICS vs LABA/LAMA: 1.31 (95% CI 0.97–1.76); I <sup>2</sup> (triple vs dual): 47%; P=0.11<br><br>SUCRA (highest to lowest): LABA/LAMA 0.73; LAMA or LABA 0.65; LABA/LAMA/ICS 0.12 |
|                                           |                                                                                                          | Overall weighted average of efficacy/safety | SUCRA (highest to lowest): LABA/LAMA, 0.59; LABA/LAMA/ICS 0.56; LAMA or LABA 0.36                                                                                                                           |
| Calzetta Expert Rev Respir Med. 2021 [88] | LABA/LAMA/ICS vs LABA/LAMA or LABA/ICS (all fixed-dose combinations) (treatment duration of 24–52 weeks) | Moderate-to-severe AECOPD                   | SUCRA (highest to lowest): LABA/LAMA/ICS 0.99; LABA/ICS 0.51; LABA/LAMA 0.01                                                                                                                                |
|                                           |                                                                                                          | FEV <sub>1</sub>                            | SUCRA (highest to lowest): LABA/LAMA/ICS 0.98; LABA/LAMA 0.51; LABA/ICS 0.02                                                                                                                                |

|                                  |                            |                                             |                                                                                                                                                                                                          |
|----------------------------------|----------------------------|---------------------------------------------|----------------------------------------------------------------------------------------------------------------------------------------------------------------------------------------------------------|
|                                  |                            | Pneumonia                                   | SUCRA (highest to lowest): LABA/LAMA 0.99; LABA/ICS 0.36; LABA/LAMA/ICS 0.15                                                                                                                             |
| Koarai Respir Investig 2022 [69] | LABA/LAMA vs LABA/LAMA/ICS | Exacerbations (24–52 weeks)                 | Significant decrease in number of exacerbations with LABA/LAMA/ICS vs LABA/LAMA (rate ratio, 0.56; 95% CI 0.38–0.85; P=0.006; I <sup>2</sup> =16%)                                                       |
|                                  |                            | SGRQ (24–52 weeks)                          | No difference in SGRQ score change from BL between LABA/LAMA/ICS and LABA/LAMA treatment (MD –1.38; 95% CI –3.25 to 0.49; P=0.15; I <sup>2</sup> =0%)                                                    |
|                                  |                            | Trough FEV <sub>1</sub> (24–52 weeks)       | Significant increase in trough FEV <sub>1</sub> with LABA/LAMA/ICS vs LABA/LAMA treatment (MD 0.04; 95% CI 0.01–0.07; P=0.01; I <sup>2</sup> =0%); however, difference was less than MCID of 0.05–0.10 L |
|                                  |                            | AEs (52 weeks)                              | No difference in total AEs between LABA/LAMA/ICS and LABA/LAMA (OR 1.07; 95% CI 0.68–1.67; P=0.77; I <sup>2</sup> =0%)                                                                                   |
|                                  |                            | Pneumonia (52 weeks)                        | Significant increase in pneumonia events with LABA/LAMA/ICS vs LABA/LAMA (OR, 3.38; 95% CI 1.58–7.22; P=0.002; I <sup>2</sup> =0%)                                                                       |
|                                  |                            | Mortality (52 weeks)                        | No significant difference in mortality between LABA/LAMA/ICS and LABA/LAMA (OR, 2.91; 95% CI 0.47–18.05; P=0.25; I <sup>2</sup> =0%)                                                                     |
| Zheng The BMJ 2018 [70]          | LABA/LAMA/ICS vs LABA/LAMA | Moderate to severe exacerbations (52 weeks) | Significantly reduced rate of moderate or severe exacerbations with LABA/LAMA/ICS vs LABA/LAMA (rate ratio 0.78; 95% CI 0.70–0.88; P=0; I <sup>2</sup> =46.3)                                            |
|                                  |                            | All-cause mortality (52 weeks)              | No significant difference for all-cause mortality (risk ratio 0.77; 95% CI 0.58–1.03; P=0.07; I <sup>2</sup> =0)                                                                                         |

|                             |                            |                                        |                                                                                                                                                                                          |
|-----------------------------|----------------------------|----------------------------------------|------------------------------------------------------------------------------------------------------------------------------------------------------------------------------------------|
|                             |                            | Trough FEV <sub>1</sub> (L) (52 weeks) | Significant improvement in trough FEV <sub>1</sub> with LABA/LAMA/ICS vs LABA/LAMA (MD 0.04; 95% CI 0.02–0.07; P=0; I <sup>2</sup> =27.1)                                                |
|                             |                            | AEs (52 weeks)                         | No significant difference for AEs (risk ratio 1.00; 95% CI 0.93–1.08; P= 0.98; I <sup>2</sup> =58.3)                                                                                     |
|                             |                            | Pneumonia events (52 weeks)            | Significantly higher rate of pneumonia with LABA/LAMA/ICS vs LABA/LAMA (risk ratio 1.53; 95% CI 1.25–1.87; P=0; I <sup>2</sup> =19.7)                                                    |
|                             |                            | SGRQ (52 weeks)                        | Significant improvement in SGRQ score with LABA/LAMA/ICS vs LABA/LAMA (MD –1.81; 95% CI –2.57 to –1.04; P=0; I <sup>2</sup> =0)                                                          |
| Koarai Respir Res 2021 [67] | LABA/LAMA/ICS vs LABA/LAMA | Exacerbations (24–52 weeks)            | Significant decrease in exacerbations with LABA/LAMA/ICS vs LABA/LAMA (rate ratio 0.73; 95% CI 0.64–0.83; P<0.00001; I <sup>2</sup> =78%)                                                |
|                             |                            | SGRQ (24–52 weeks)                     | Significant improvement in SGRQ score change from BL with LABA/LAMA/ICS (MD –1.71; 95% CI –2.27 to –0.92; P<0.00001; I <sup>2</sup> =0%); however, difference was less than MCID of –4.0 |
|                             |                            | TDI (24–52 weeks)                      | Significant improvement in TDI score change from BL with LABA/LAMA/ICS (MD 0.33; 95% CI 0.18–0.48; P<0.00001; I <sup>2</sup> =6%); however, difference was less than MCID of 1.0         |
|                             |                            | Trough FEV <sub>1</sub> (24–52 weeks)  | Significant increase in trough FEV <sub>1</sub> with LABA/LAMA/ICS (MD 0.04; 95% CI 0.01–0.07; P=0.02; I <sup>2</sup> =86%); however, difference was less than MCID of 0.05 to 0.10 L    |
|                             |                            | AEs (52 weeks)                         | No difference in total AEs between LABA/LAMA/ICS and LABA/LAMA (OR 1.03;                                                                                                                 |

|                              |                                                            |                                                      |                                                                                                                                                |
|------------------------------|------------------------------------------------------------|------------------------------------------------------|------------------------------------------------------------------------------------------------------------------------------------------------|
|                              |                                                            |                                                      | 95% CI 0.93–1.15; P=0.58; I <sup>2</sup> =34%)                                                                                                 |
|                              |                                                            | Pneumonia events (52 weeks)                          | Significant increase in pneumonia events with LABA/LAMA/ICS (OR 1.52; 95% CI 1.16–2.00; P=0.003; I <sup>2</sup> =32%)                          |
|                              |                                                            | Mortality (52 weeks)                                 | The incidence was small, but the frequency with LABA/LAMA/ICS was significantly lower (OR 0.66; 95% CI 0.50–0.87; P=0.003; I <sup>2</sup> =0%) |
| Mammen Annals ATS 2020b [68] | LABA/LAMA/ICS vs LABA/LAMA                                 | AECOPD (24–52 weeks)                                 | Rate ratio 0.71 (95% CI 0.59–0.86; P=0.0003; I <sup>2</sup> =78%)                                                                              |
|                              |                                                            | Pneumonia (24–52 weeks)                              | Risk ratio 1.41 (95% CI 1.05–1.89; P=0.02; I <sup>2</sup> =28%)                                                                                |
|                              |                                                            | Dyspnea (14–52 weeks)                                | MD 0.09 (95% CI –0.01 to 0.19; P=0.09; I <sup>2</sup> =0%)                                                                                     |
|                              |                                                            | Mortality (24–52 weeks)                              | Risk ratio 0.73 (95% CI 0.53–1.02; P=0.06; I <sup>2</sup> =0%)                                                                                 |
|                              |                                                            | Treatment-emergent AEs (24–52 weeks)                 | Risk ratio 1.01 (95% CI 0.94–1.09); P=0.78; I <sup>2</sup> =51%)                                                                               |
| Lee PloS Med 2019 [74]       | LABA/LAMA/ICS vs LABA/LAMA (study duration of 12–72 weeks) | Post- bronchodilator FEV <sub>1</sub> % of predicted | SUCRA (highest to lowest): LABA/LAMA/ICS, 0.958; LABA/ICS, 0.777; LABA, 0.539; LABA/LAMA, 0.407; ICS, 0.340; Placebo, 0.244; LAMA, 0.235       |
|                              |                                                            | Total exacerbation in the past year (%)              | SUCRA (highest to lowest): LABA/LAMA/ICS, 0.973; ICS, 0.697; LABA/ICS, 0.688; LABA/LAMA, 0.446; LABA, 0.359; LAMA, 0.203; placebo, 0.134       |
|                              |                                                            | mMRC scale                                           | SUCRA (highest to lowest): LAMA, 0.775; LABA/LAMA/ICS, 0.668; LABA/LAMA, 0.525; ICS, 0.451; placebo, 0.430; LABA/ICS, 0.419; LABA, 0.233       |
|                              |                                                            | Reversibility (%)                                    | SUCRA (highest to lowest): LABA/LAMA/ICS, 0.855;                                                                                               |



|  |  |  |                                                                                                  |
|--|--|--|--------------------------------------------------------------------------------------------------|
|  |  |  | LABA/ICS, 0.726;<br>LABA/LAMA, 0.553; LABA,<br>0.473; ICS, 0.466; LAMA,<br>0.262; placebo, 0.164 |
|--|--|--|--------------------------------------------------------------------------------------------------|

AE, adverse event; AECOPD, acute exacerbations of chronic obstructive pulmonary disease; BL, baseline; CI, confidence interval; COPD, chronic obstructive pulmonary disease; FEV<sub>1</sub>, forced expiratory volume in 1 s; HR, hazard ratio; HRQoL, health-related quality of life; ICS, inhaled corticosteroid; LABA, long-acting  $\beta_2$ -agonist; LAMA, long-acting muscarinic antagonist; MCID, minimal clinically important difference; MD, mean difference; mMRC, modified Medical Research Council; N/A, not applicable; OR, odds ratio; RCT, randomized controlled trial; SAMA, short-acting muscarinic antagonist; SGRQ, St George's Respiratory Questionnaire; SMD, standardized MD; SUCRA, surface under the cumulative ranking curve; TDI, transitional dyspnea index.
